# Supplementary material for: Disease manifestations of Helicobacter pylori infection in Arctic Canada: using epidemiology to address community concerns
Source: HighWire-hosted journal article supplement (doi:10.1136/bmjopen-2013-003689), 2014-01-01

## Supplementary Figures

Figure 1. Severe chronic and acute inflammation with lymphoid aggregates in a routine histologic section from an individual with high *H. pylori* density. Low power view at 40X of hematoxylin- and eosin-stained histologic section.

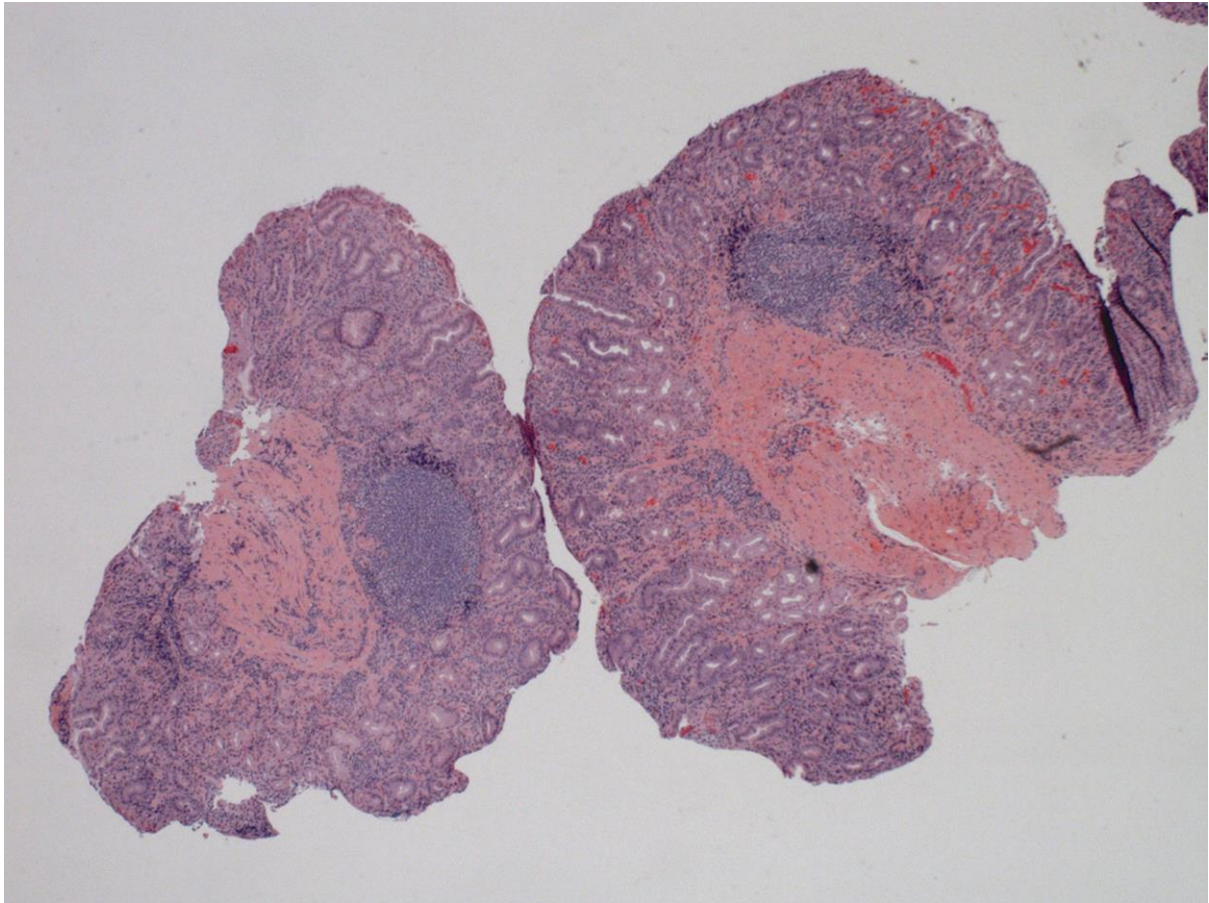

Figure 2. Sheets of plasma cells and many intraepithelial neutrophils in an individual with severe chronic and acute inflammation and high *H. pylori* density. High power view at 400X of routine Giemsa-stained histologic section.

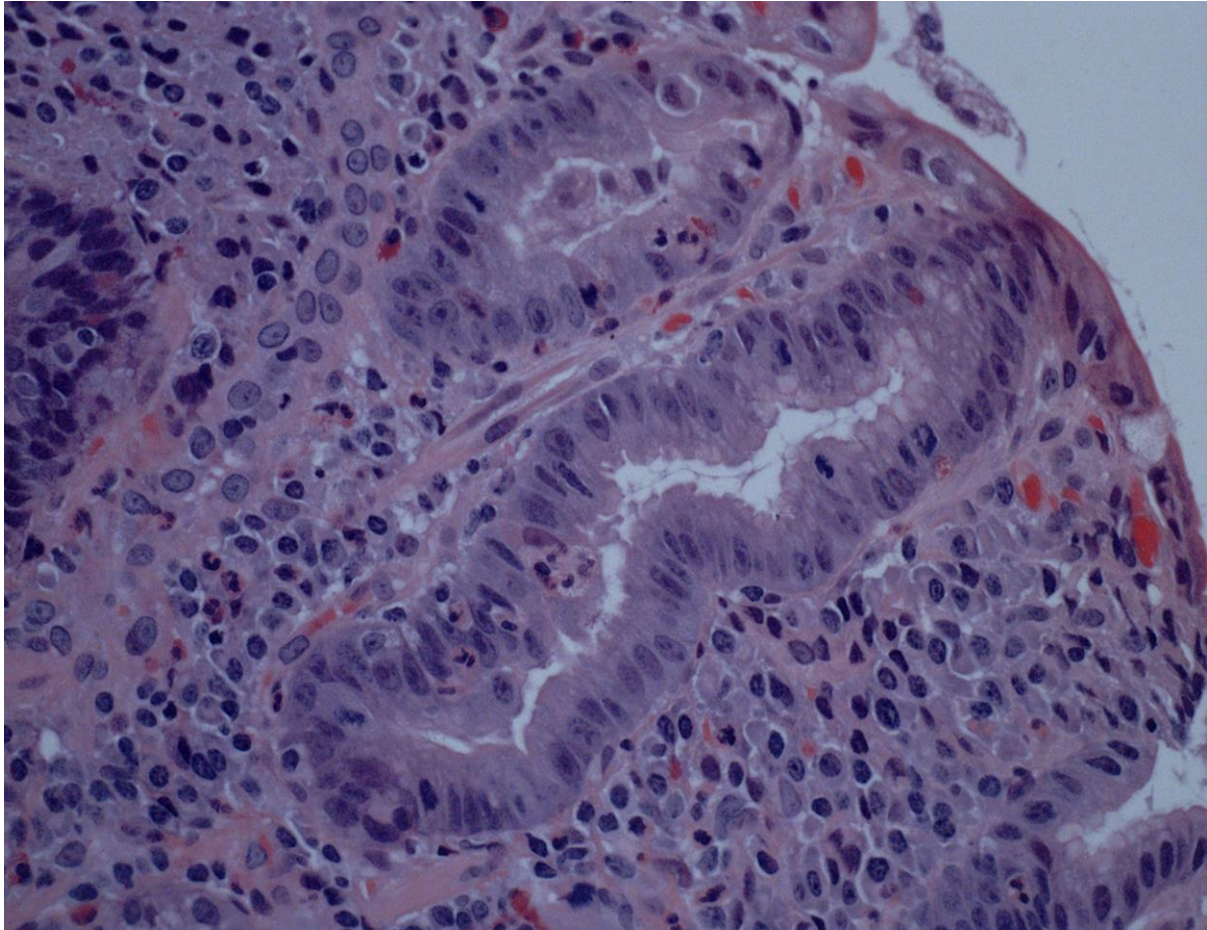

Figure 3. Numerous *Helicobacter pylori* organisms in an individual with high *H. pylori* density and severe chronic and acute inflammation. High power view at 1000X under oil of routine Giemsa-stained histologic section.

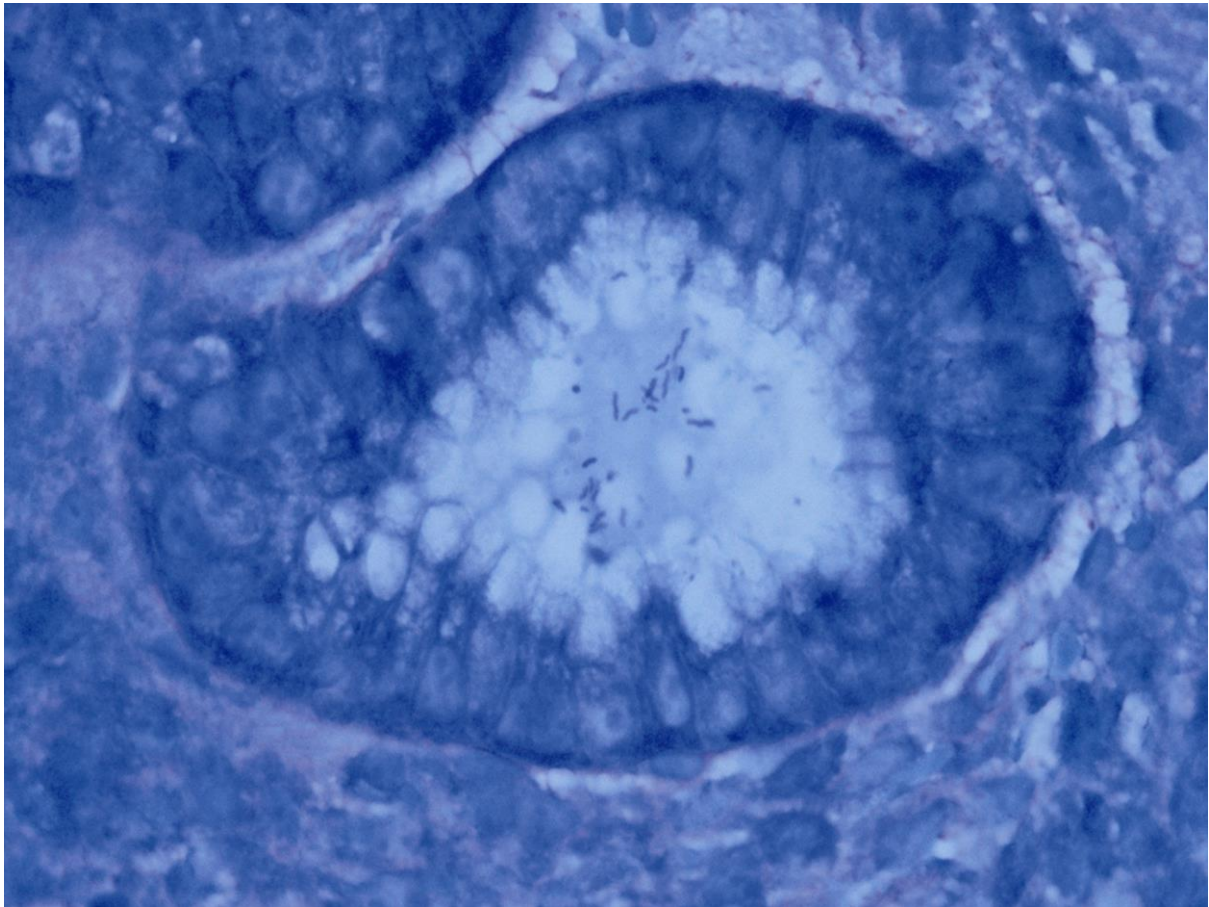

Supplement: bmjopen-2013-003689supp.pdf [file bmjopen-2013-003689supp.pdf]
